# Supplementary material for: scAnt —an open-source platform for the creation of 3D models of arthropods (and other small objects)
Source: PeerJ journal article supplement (doi:10.7717/peerj.11155), 2021-04-12

A

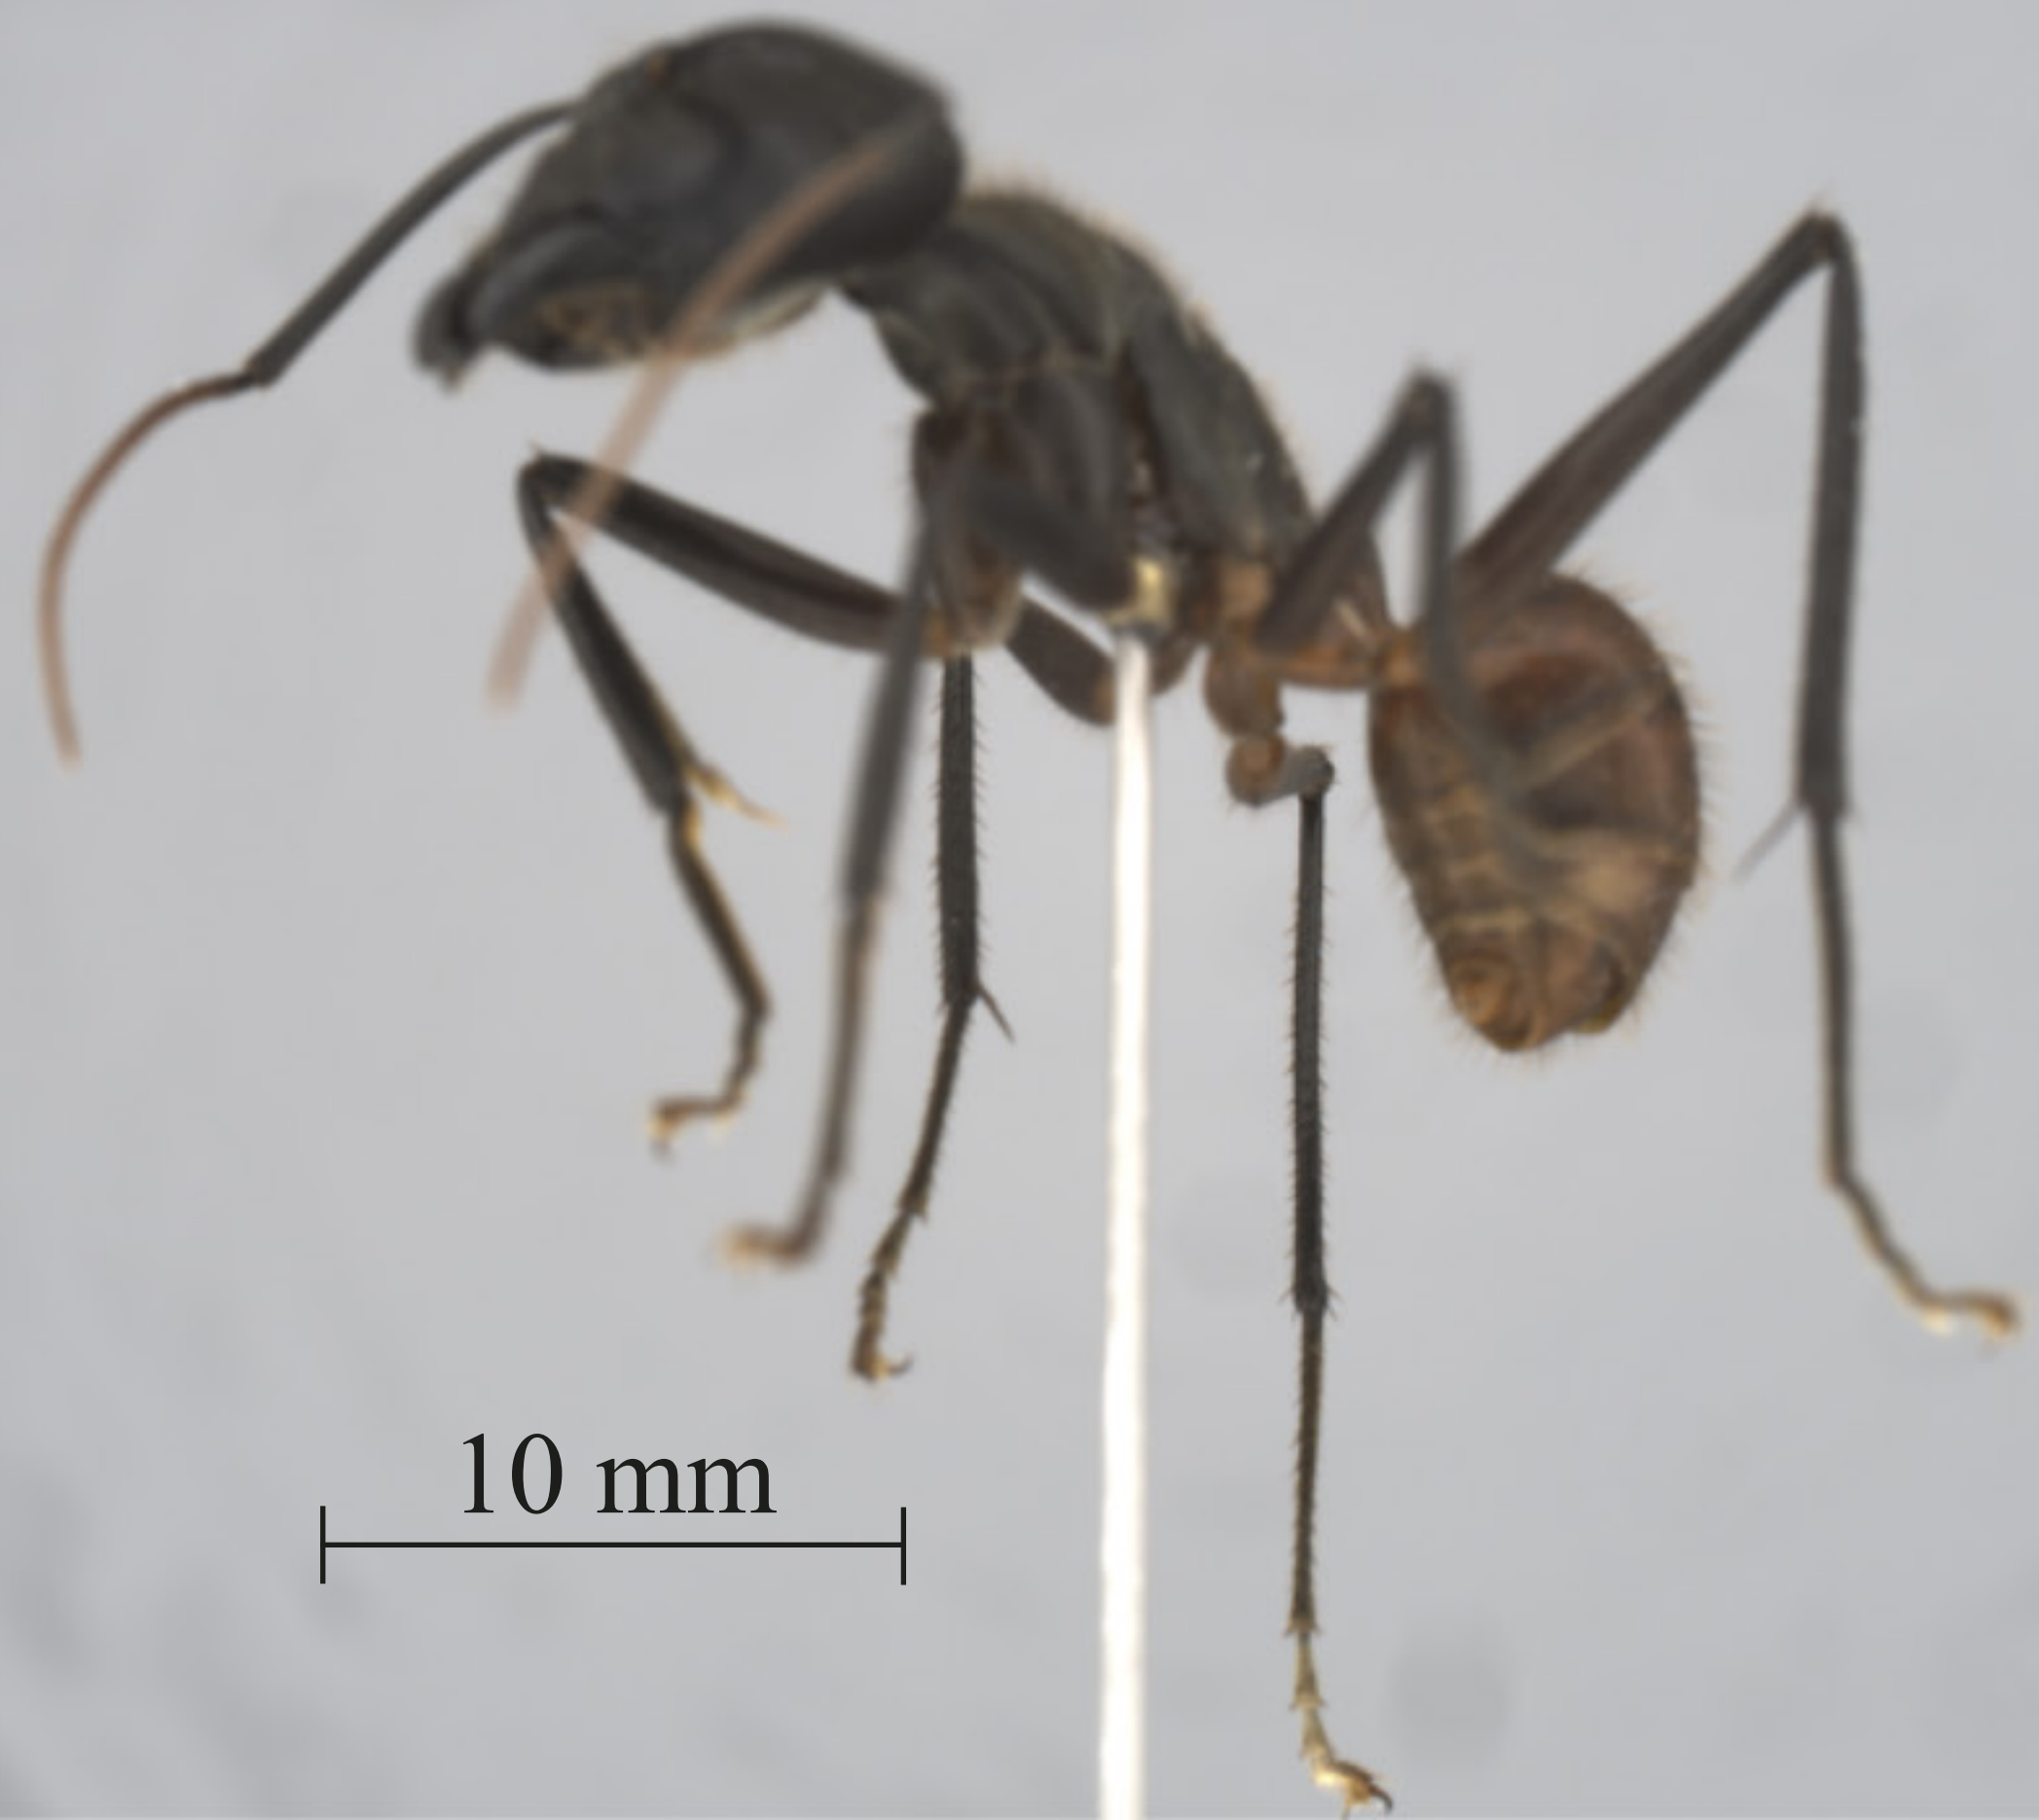

10 mm

B

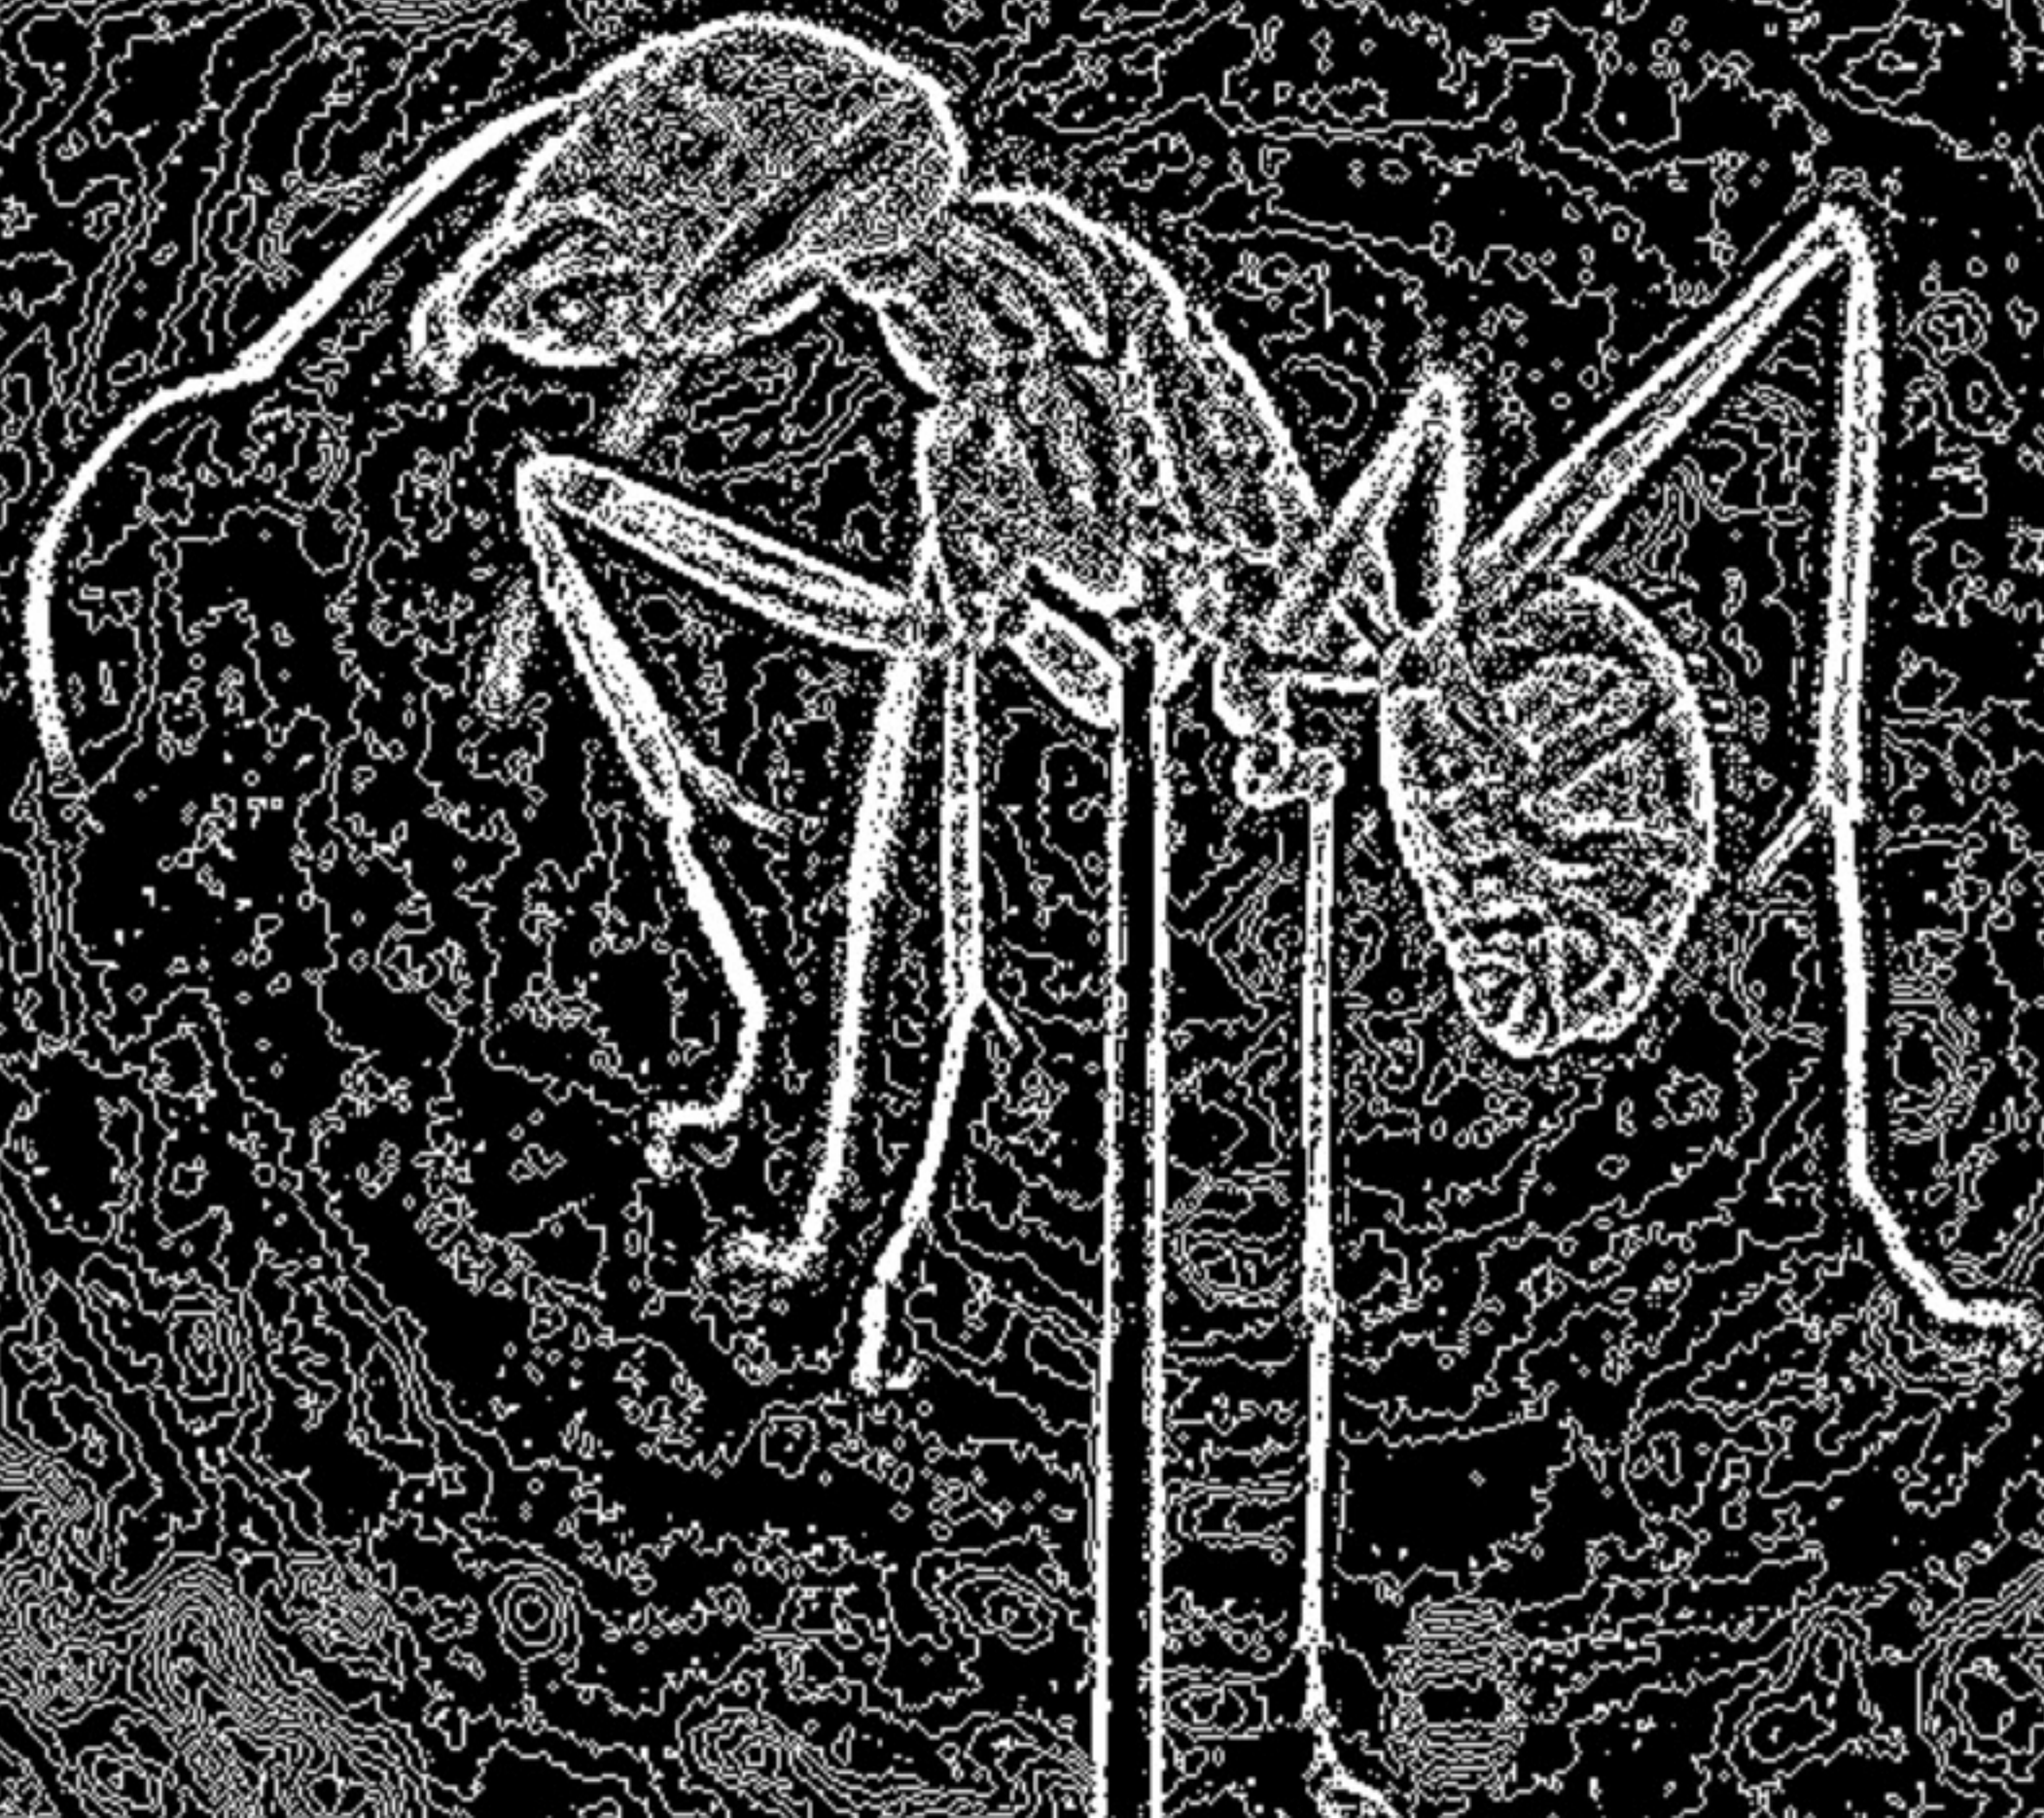

Supplement: Figure_Sup_02.pdf [file Figure_Sup_02.pdf]
