# Supplementary material for: scAnt —an open-source platform for the creation of 3D models of arthropods (and other small objects)
Source: PeerJ journal article supplement (doi:10.7717/peerj.11155), 2021-04-12

flat lighting

resulting masks

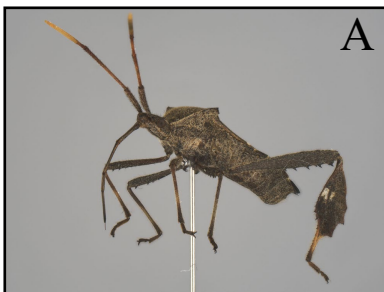

random forest-  
based outline  
detection

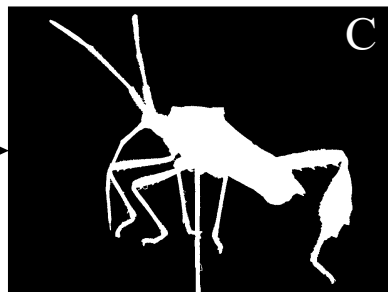

hand-annotated  
ground truth

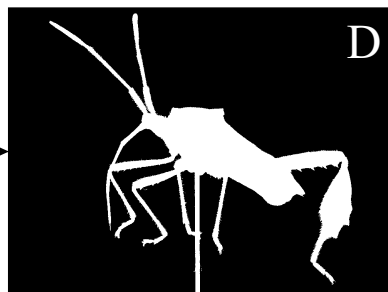

backlighting

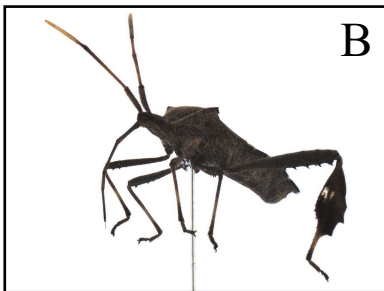

backlight  
thresholding

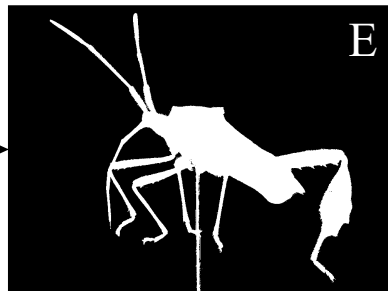

Supplement: Figure_Sup_04.pdf [file Figure_Sup_04.pdf]
